# Supplementary material
Source: PubMed Central journal article supplement (PMC2975714)

**Supplementary Table 1. DNA sequence of PCR primers**

| Gene            | Forward primer (5' to 3') | Reverse primer (5' to 3') |
|-----------------|---------------------------|---------------------------|
| LXR $\alpha$    | TGAGAGTATCACCTTCCTCA      | AGAAGATGCTGATAGCAATG      |
| LXR $\beta$     | AACTAATGATCCAGCAGTTG      | ATCTCCTGGACTGAGATGAT      |
| ABCA1           | ATCATTGGCCCTCATTCCA       | CTGTCACAGCTTTATTTTGTGACTC |
| ABCG1           | GCCTGAAGGCCTACTACCTG      | AGGAGATGTAGGACATCCACTG    |
| SREBP1c         | CCATGGATTGCACTTTCGAA      | CCAGCATAGGGTGGGTCAAA      |
| FAS             | GCCTACACCCAGAGCTACCG      | GCCATGGTACTTGGCCTTG       |
| GAPDH           | TGCACCACCAACTGCTTAG       | GGATGCAGGGATGATGTTC       |
| Cyclin A        | CCTTAGGGAAATGGAGGTTAAA    | CCAAATGCAGGGTCTCATTC      |
| Cyclin A1       | TTCCTGCTGGATTTCAACACA     | CAACCTCCACCAGCCAGTC       |
| Cyclin B1       | GGTGAATGGACACCAACTCT      | TGTTCTTGACAGTCATGTGCTTTG  |
| Cyclin D1       | TTCCTCTCCAAAATGCCAGA      | CAGTCCGGGTCACACTTGAT      |
| Cyclin E        | TCAGTGGTGCGACATAGAGAA     | TGTCCAGCAAATCCAAGCTG      |
| CDC25A          | CCCTGAGCTGTATGTCCTGAA     | GCTCTTGGTGCGGAACTTCT      |
| p15             | GCATATGTTATTGGGGAAAGGA    | GGTGCAATGGGAAGAAAAGC      |
| p21             | AGGGGAAGGGACACACAAGA      | GATGAGGAAGGTCGCTGGAC      |
| p27             | AGGAGAGCCAGGATGTCAGC      | GGGGAACCGTCTGAAACATT      |
| p53             | TCACAGCACATGACGGAGGT      | TGGAGTCTCCAGTGTGATGATG    |
| MDM2            | CGACAAAGAAAACGCCACAA      | CGATGGCGTCCCTGTAGATT      |
| GADD45 $\alpha$ | GCTGCGAGAACGACATCAAC      | GACTTTCCCGGCAAAAACAA      |
| MYC             | CACCACCAGCAGCGACTCT       | GGCACCTCTTGAGGACCAGT      |

**Supplementary Table 2. DNA sequence of siRNA oligos**

| Gene               | Sense sequences      | Antisense sequences   |
|--------------------|----------------------|-----------------------|
| hSREBP1_2394       | CCACCGUUUCUUCGUGGAU  | AUCCACGAAGAAACGGUGG   |
| hSREBP1_3478       | GACUGUCAGCAGAUGCUC   | UGAGCAUCUGCUGACAGUC   |
| hSREBP1_2493       | GACUCAGCUAUUCCGGGAA  | UUCCCGGAAUAGCUGAGUC   |
| hFAS_6124          | GAGCGUAUCUGUGAGAAAC  | AAGUUUCUCACAGAUACGCUC |
| hFAS_6089          | GACAGAGCAACUACGGCUU  | AAGCCGUAGUUGCUCUGUC   |
| hFAS_6428          | UCAACCUUGGACAGCUCACU | AGUGAGCUGUCCAGGUUGA   |
| hLXR $\alpha$ _934 | GAGACAUCUCGGAGGUACA  | UGUACCUCCGAGAUGUCUC   |
| hLXR $\alpha$ _542 | CAGAAGAACAGAUCGCCU   | AGGCGGAUCUGUUCUUCUG   |
| hLXR $\beta$ _508  | CGAGCUUUGCCGUGUCUGU  | ACAGACACGGCAAAGCUCG   |
| hLXR $\beta$ _1176 | CCACUAUCGAGAUCAUGCU  | AGCAUGAUCUCGAUAGUGG   |

**Supplementary Figure Legends:**

**Supple. Fig. 1. LXR activation dose-dependently represses the proliferation of RWPE1 cells.** RWPE1 cells were incubated with LXR ligand, (A) T0901317 and (B) GW3965 for 2 days and microscopic images were taken.

**Supple. Fig. 2. GW3965 suppress the proliferation via G1 arrest in LNCaP cells.** GW3965 was treated to LNCaP cells for 2 days and relative cell number was monitored with (A) microscopic image and (B) CCK-8 assay. (C) Percentage of the cells on each phase was calculated with FACS analysis.

**Supple. Fig. 3. Effect of SREBP1 and FAS knockdown on activated LXR-induced cell cycle arrest.** (A) RWPE1 cells were transfected with siRNA for control, SREBP1#1 (hSREBP1\_2394), SREBP1#2 (hSREBP1\_3478), SREBP1#3 (hSREBP1\_2493) and FAS#1 (hFAS\_6124), FAS#2 (hFAS\_6089), FAS#3 (hFAS\_6428) and treated with T0901317 (T; 1  $\mu$ M) for 18 hr. Then, total RNA was isolated and target gene expression was analyzed by real-time quantitative PCR. (B) Transfected RWPE1 cells were incubated with 3  $\mu$ M of T0901317. After 2 days incubation, microscopic images were taken. (C) Transfected RWPE1 cells with each

siRNA were incubated with 3  $\mu$ M of T0901317 for 2 days and Oil-red O staining was carried out.

**Supple. Fig. 4. Expression level of LXR $\alpha$  and LXR $\beta$  in various cell lines.** Total RNA was isolated from various cell lines such as RWPE1, THP1, SNU16, LNCaP, HepG2, PC3, HEK293, and HeLa cells. After synthesizing cDNA from total RNA, relative expression level of LXR  $\alpha$  and  $\beta$  was analyzed by real-time quantitative PCR. Each value was normalized with GAPDH.

**Supple. Fig. 5. Knockdown of LXR $\alpha$  and LXR $\beta$  on activated LXR-induced cell cycle arrest.** (A) RWPE1 cells were transfected with control or LXR $\alpha/\beta$  siRNA (hLXR $\alpha$ \_934, hLXR $\alpha$ \_542, hLXR $\beta$ \_508, and hLXR $\beta$ \_1176). After incubation with T0901317 (1  $\mu$ M) for 18 hr, LXR $\alpha/\beta$  and target gene expressions were analyzed by real-time quantitative PCR. The representative result was shown in the panels from three independent experiments. Transfected RWPE1 cells were incubated with (B and C) 3  $\mu$ M of T0901317 and (D and E) 1  $\mu$ M of GW3965 (GW). After 2 days incubation, microscopic images were taken and relative cell numbers were determined by CCK-8 assay. (F) Transfected RWPE1 cells were incubated with T0901317 (T; 3  $\mu$ M) for 2 days and Oil-red O staining was carried out.

**Supple. Fig. 6. Effect of LXR activation on the proliferation of MEF cells.** (A) Each MEF cell was incubated with T0901317 for 2 days and relative cell number was determined with CCK-8 assay. (B) MEF cells were treated with T0901317 for 18 hr and target gene expression was evaluated with real-time quantitative PCR.

# Supple. Fig. 1

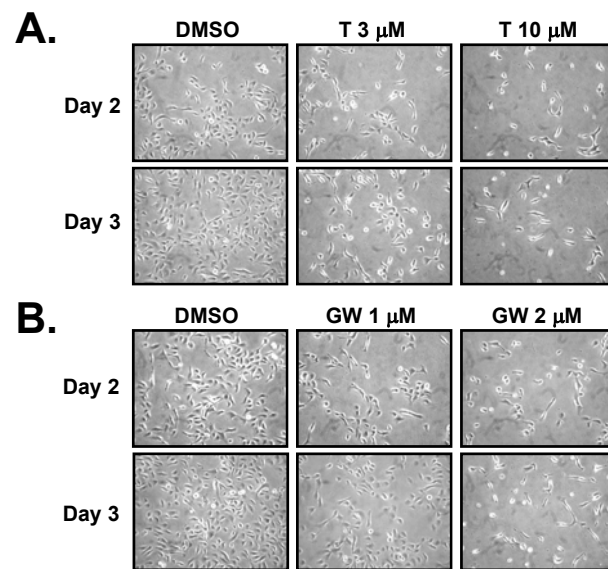

## Supple. Fig. 2

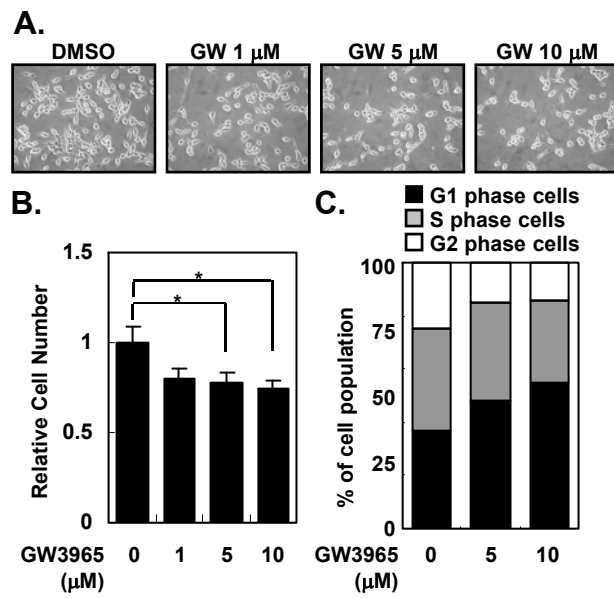

# Supple. Fig. 3

**A.**

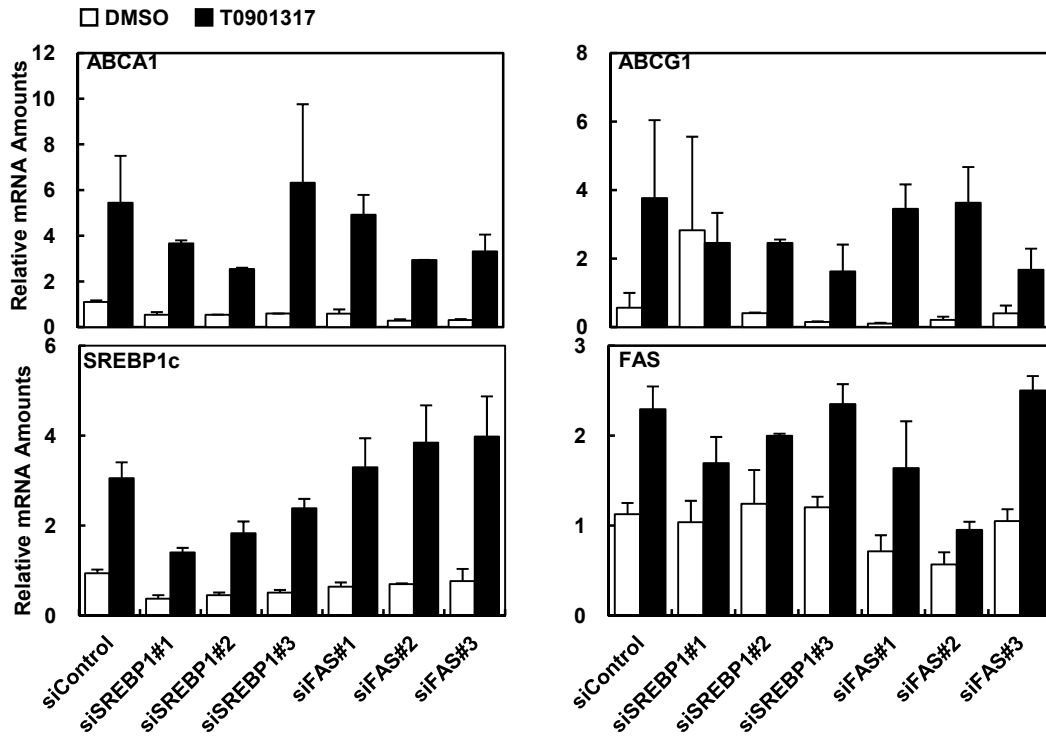

**B.**

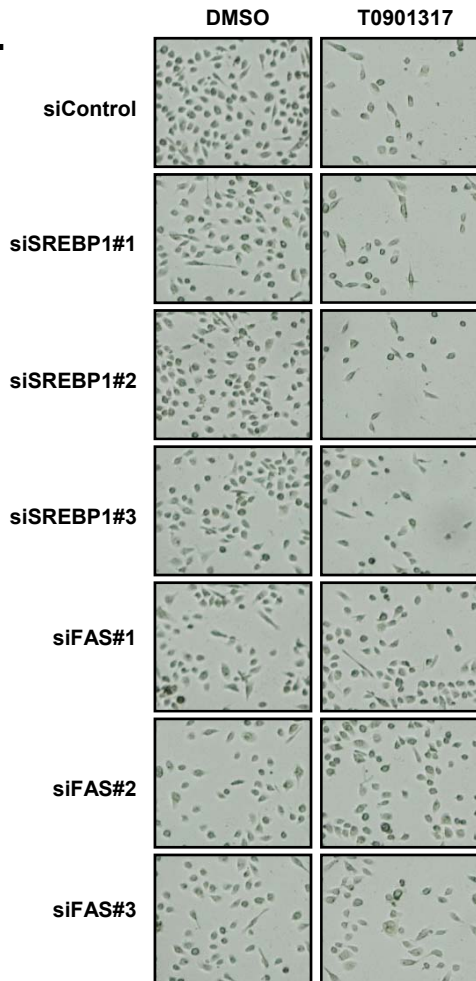

**C.**

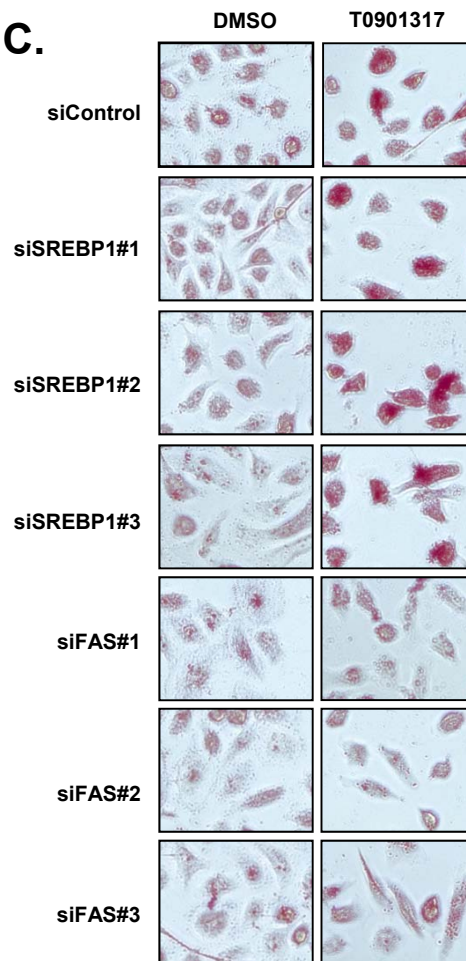



## Supple. Fig. 4

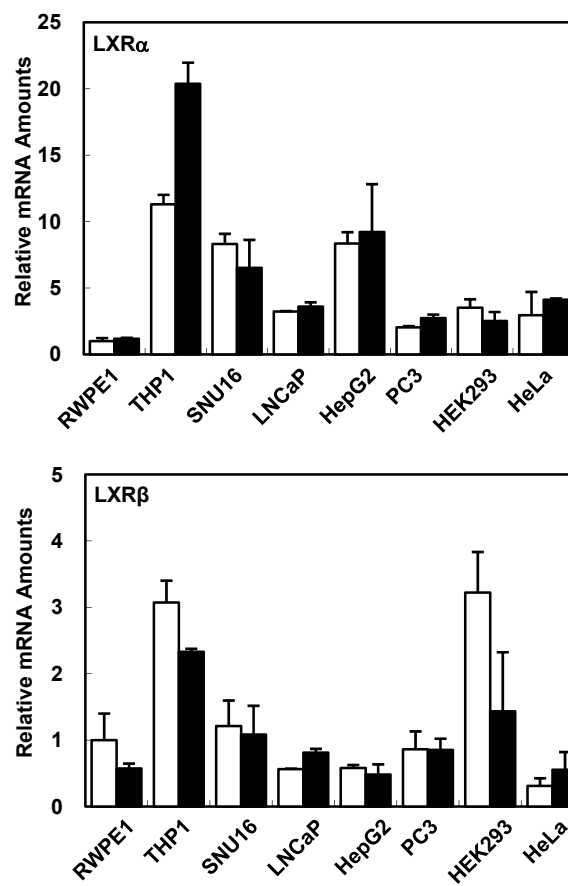

# Supple. Fig. 5

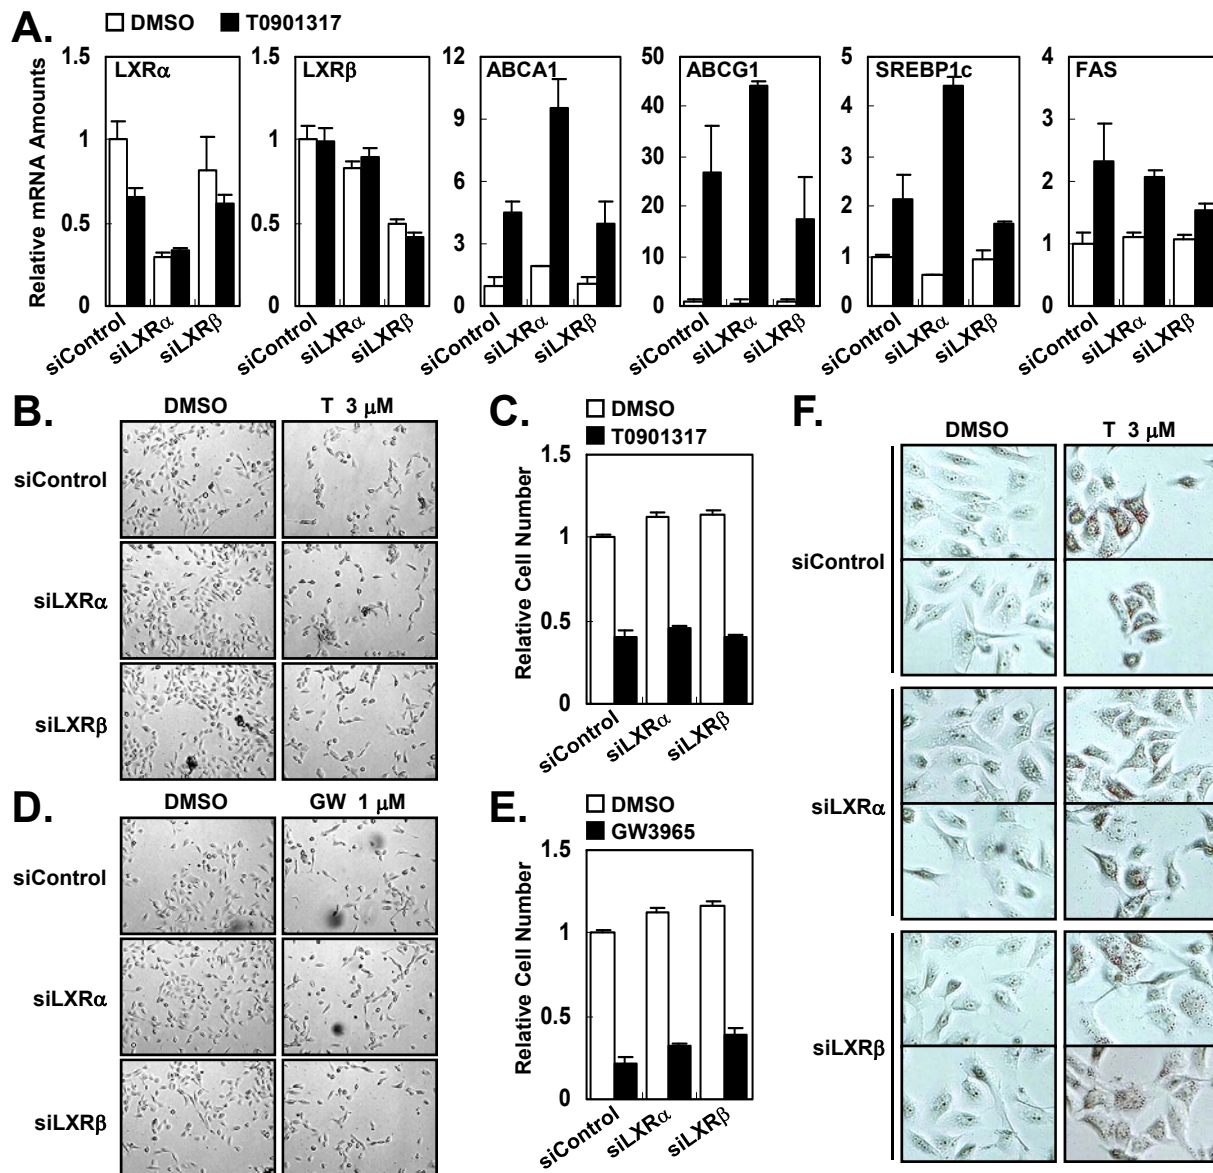

## Supple. Fig. 6

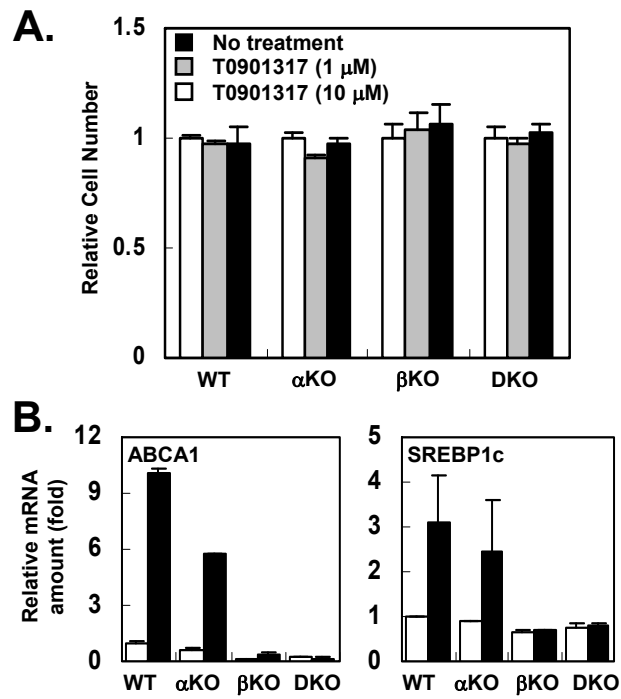

Supplement: supp_M007989_jlr.M007989-1.pdf [file supp_M007989_jlr.M007989-1.pdf]
